# Supplementary material for: Cerebrospinal fluid A beta 1–40 peptides increase in Alzheimer’s disease and are highly correlated with phospho-tau in control individuals
Source: PubMed Central journal article supplement (PMC7532565; doi:10.1186/s13195-020-00696-1), 2020-10-02

Sup Figure 3

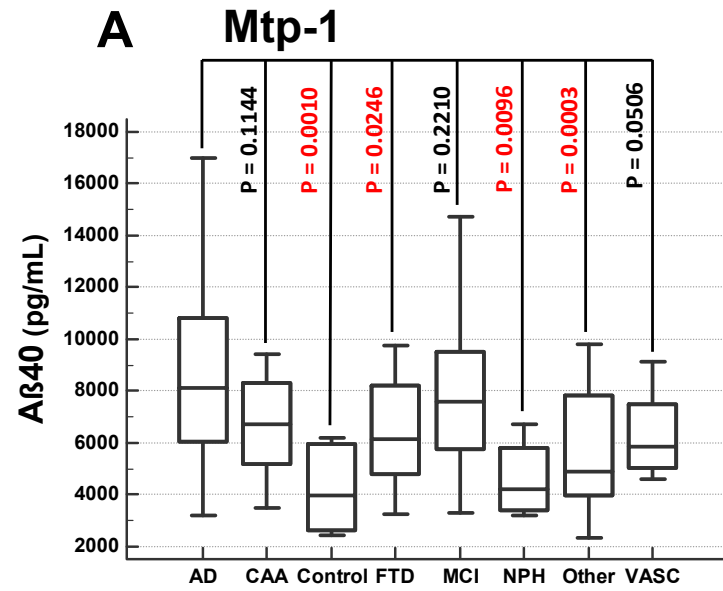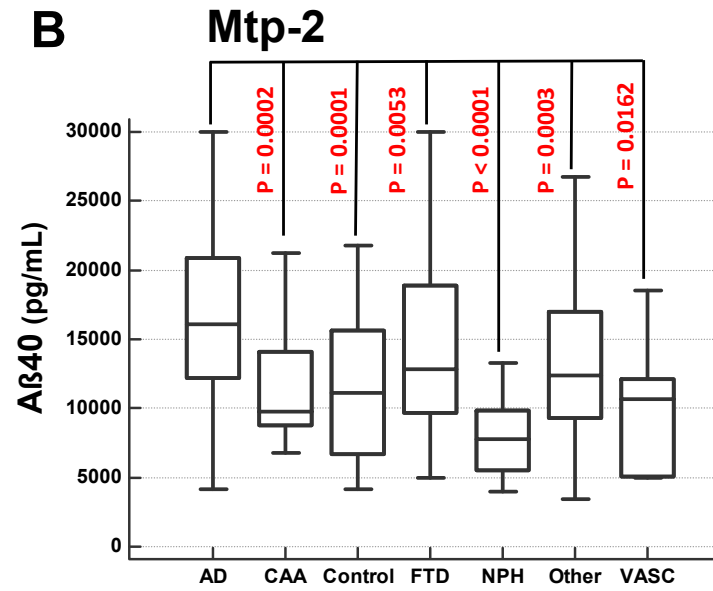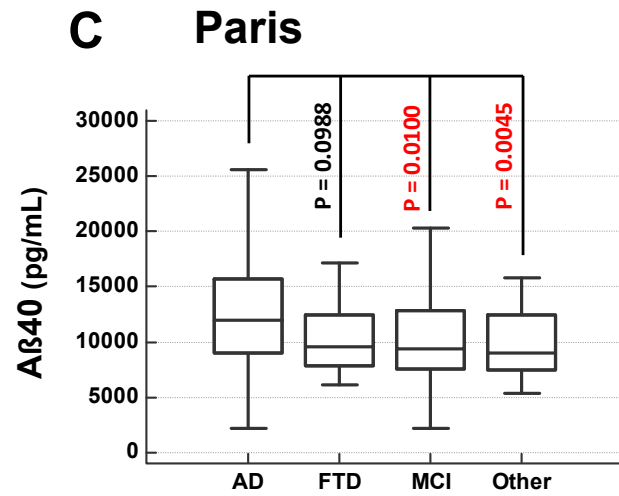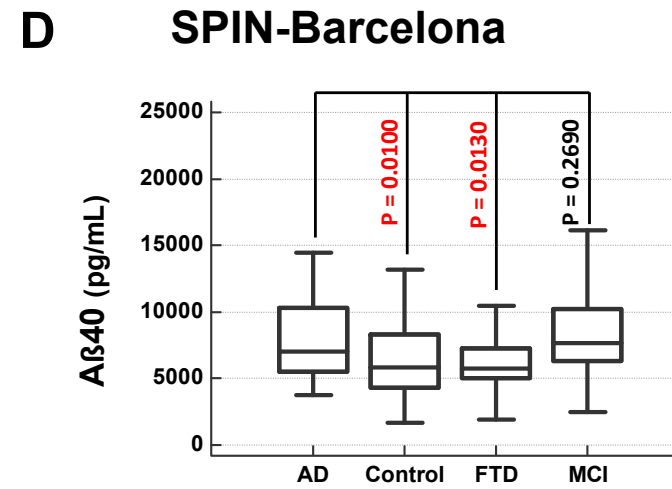

Supplement: 13195_2020_696_MOESM5_ESM.pdf [file 13195_2020_696_MOESM5_ESM.pdf]
